# Supplementary material for: Association between trial registration and positive study findings: cross sectional study (Epidemiological Study of Randomized Trials—ESORT)
Source: PubMed Central journal article supplement — BMJ. 2017 Mar 14;356:j917. doi: 10.1136/bmj.j917 (PMC6283391; doi:10.1136/bmj.j917), 2017-03-14
Supplement: odua035992.ww1.pdf [file odua035992.ww1.pdf]

## **Supplementary Methods**

### **Search Strategy for PubMed**

1. (randomized controlled trial [pt] OR controlled clinical trial [pt] OR randomized controlled trials [mh] OR random allocation [mh] OR double blind method [mh] OR single blind method [mh] OR cross-over studies [mh] OR multicenter study [pt]) NOT (animal [mh] NOT human [mh])

2. Limit to 2012-12-01 [pdat] to 2012-12-31 [pdat]

**Supplementary Table 1: Full Regression Models for the Association Between Trial Registration and Positive Study Findings**

|                                                         | <b>Overall</b>              | <b>Non Industry Funded</b>  | <b>Industry Funded</b>      |
|---------------------------------------------------------|-----------------------------|-----------------------------|-----------------------------|
| <b>Overall Registration</b>                             | <b>Adjusted RR (95% CI)</b> | <b>Adjusted RR (95% CI)</b> | <b>Adjusted RR (95% CI)</b> |
| Any Registration versus not registered                  | 0.87 (0.79 to 0.98)         | 0.75 (0.63 to 0.89)         | 1.02 (0.78 to 1.34)         |
| <b>Funding Source</b>                                   |                             |                             |                             |
| Industry versus non-industry funded                     | 0.99 (0.86 to 1.14)         | -                           | -                           |
| Unclear funding versus non-industry funded              | 1.12 (1.00 to 1.26)         | -                           | -                           |
| Sample size (continuous, per 1000 persons)              | 0.99 (0.96 to 1.03)         | 0.99 (0.98 to 1.02)         | 0.88 (0.71 to 1.06)         |
| Random sequence generation reported versus not reported | 1.05 (0.94 to 1.17)         | 1.08 (0.92 to 1.27)         | 1.03 (0.81 to 1.32)         |
| Allocation concealment reported versus not reported     | 0.93 (0.83 to 1.05)         | 0.90 (0.75 to 1.09)         | 1.02 (0.79 to 1.32)         |
| Drug versus non-drug intervention                       | 1.13 (1.01 to 1.26)         | 1.04 (0.89 to 1.22)         | 1.17 (0.89 to 1.53)         |
| <b>Number of centres</b>                                |                             |                             |                             |
| Single centre versus multicentre                        | 0.99 (0.85 to 1.15)         | 1.01 (0.79 to 1.28)         | 0.93 (0.67 to 1.28)         |
| Unclear versus multicentre                              | 1.02 (0.89 to 1.17)         | 0.99 (0.79 to 1.24)         | 1.16 (0.91 to 1.47)         |
| <b>Stratified by Timing of Registration</b>             |                             |                             |                             |
| <b>Timing of Registration</b>                           |                             |                             |                             |
| Prospective registration versus not registered          | 0.87 (0.74 to 1.02)         | 0.75 (0.58 to 0.98)         | 1.04 (0.76 to 1.42)         |
| Retrospective registration versus not registered        | 0.88 (0.77 to 0.99)         | 0.75 (0.62 to 0.90)         | 1.01 (0.76 to 1.34)         |
| <b>Funding Source</b>                                   |                             |                             |                             |
| Industry versus non-industry funded                     | 0.99 (0.86 to 1.15)         | -                           | -                           |
| Unclear funding versus non-industry funded              | 1.12 (1.00 to 1.26)         | -                           | -                           |
| Sample size (continuous, per 1000 persons)              | 0.99 (0.96 to 1.03)         | 0.99 (0.98 to 1.02)         | 0.88 (0.71 to 1.06)         |
| Random sequence generation reported versus not reported | 1.05 (0.94 to 1.17)         | 1.08 (0.92 to 1.27)         | 1.03 (0.81 to 1.32)         |
| Allocation concealment reported versus not reported     | 0.93 (0.83 to 1.05)         | 0.90 (0.75 to 1.09)         | 1.02 (0.79 to 1.32)         |

|                                   |                     |                     |                     |
|-----------------------------------|---------------------|---------------------|---------------------|
| Drug versus non-drug intervention | 1.13 (1.01 to 1.26) | 1.04 (0.89 to 1.22) | 1.17 (0.89 to 1.53) |
| Number of centres                 |                     |                     |                     |
| Mutlicentre versus single centre  | 0.99 (0.85 to 1.15) | 1.01 (0.79 to 1.28) | 0.93 (0.67 to 1.28) |
| Unclear versus single centre      | 1.02 (0.89 to 1.17) | 0.99 (0.79 to 1.24) | 1.16 (0.91 to 1.47) |
